# Supplementary material
Source: Springer Nature journal article supplement (https://www.springermedizin.de/resource/supplementary/12911_2013_782_MOESM2_ESM.pdf/9526780)
Supplement: MOESM2 [file 9526780]

| Study | Randomisation bias | Allocation bias | Performance bias | Attrition bias | Reporting bias | Other bias |
|-------|--------------------|-----------------|------------------|----------------|----------------|------------|
| [40]  | ?                  | ?               | -                | ?              | -              | +          |
| [9]   | ?                  | ?               | +                | -              | -              | -          |
| [6]   | -                  | -               | ?                | -              | +              | -          |
| [39]  | ?                  | ?               | +                | -              | +              | +          |
| [37]  | ?                  | ?               | ?                | -              | -              | -          |
| [38]  | ?                  | ?               | ?                | -              | ?              | ?          |
| [36]  | +                  | +               | ?                | -              | ?              | -          |
| [7]   | -                  | ?               | ?                | -              | -              | -          |
| [8]   | +                  | +               | ?                | +              | +              | +          |
| [43]  | -                  | -               | -                | -              | -              | -          |
| [35]  | -                  | -               | ?                | -              | ?              | -          |
| [44]  | +                  | +               | +                | +              | +              | +          |
| [41]  | ?                  | ?               | ?                | -              | -              | +          |
| [42]  | +                  | +               | +                | +              | +              | +          |

Criterion met – low risk of bias  
 Evidence unclear  
 Criterion not met – high risk of bias
